# Supplementary material for: Newly Diagnosed Crohn’s Disease Patients in India and Israel Display Distinct Presentations and Serological Markers: Insights from Prospective Cohorts
Source: MDPI journal article supplement (doi:10.3390/jcm11236899), 2022-11-22
Supplement: s1 [file s1]

Supplementary Materials

# Newly Diagnosed Crohn's Disease Patients in India and Israel Display Distinct Presentations and Serological Markers: Insights from Prospective Cohorts

**Supplementary Table S1.** Susceptibility genes variation.

| Gene Name     | SNP ID      | Assay ID            |
|---------------|-------------|---------------------|
| ATG16L1       | rs2241880   | C__9095577_20       |
| ATG16L1       | rs4663402   | C__28001596_10      |
| ATG16L1       | rs4663421   | C__27884541_10      |
| NOD2          | rs2066844   | C__11717468_20      |
| NOD2          | rs2066845   | C__11717466_20      |
| NOD2          | rs2066847   | C__60383785_10      |
| CARD8         | rs2043211   | C__11708080_1_      |
| CARD9         | rs10781499  | C__25957125_10      |
| NOX3          | rs6557421   | C__2468042_30       |
| DUOX2         | rs151261408 | C__163885945_10     |
| IRGM          | rs11741861  | C__176034574_10     |
| IRGM          | rs4958847   | C__1398968_10       |
| IRGM          | rs1000113   | C__27107152_10      |
| IRGM          | rs180802994 | C__176206673_10     |
| MHC           | rs9279411   | See probes below *  |
| XACT          | rs5929166   | C__29023189_10      |
| IGFBP         | rs75764599  | C__100812686_10     |
| FOXO3         | rs147856773 | See probes below ** |
| TNF- $\alpha$ | rs1799964   | C__7514871_10       |
| TNF- $\alpha$ | rs1799724   | C__11918223_10      |
| JAK2          | rs1887428   | C__12095830_20      |

\* MHC\_rs9279411 ‡ PrimerFW GGGAGCGGAGAGGAGGATTCTGA. PrimerRV TCTT-GCCCGGCCAATGCTTATCC. Probe FAM-CCTGCCCCGTCCCCC. Probe VIC-CTGCCCTGTCCCCC. \*\* FOXO3\_rs147856773 ‡ PrimerFW GTGG-CATTTTAATGTTCTCAGAACCA. PrimerRV GCCTGAACCTCAATTCCTGATTTC. Probe VIC-CAGTGTGATGTAAGAAA. Probe FAM-TGTGATGTGGTAAGAAA.

**Supplementary Table S2.** Comparison of demographic characteristics between patients with newly diagnosed complicated and uncomplicated CD phenotype in Indian and Israeli cohorts.

|                                                        | Indian cohort (n=104)              |                                   |         | Israeli cohort (n=156)              |                                    |         |
|--------------------------------------------------------|------------------------------------|-----------------------------------|---------|-------------------------------------|------------------------------------|---------|
|                                                        | Complicated phe-<br>notype& (n=50) | Uncomplicated<br>phenotype (n=53) | P value | Complicated<br>phenotype&<br>(n=47) | Uncomplicated<br>phenotype (n=109) | P value |
| <b>Gender</b> (male), n(%)                             | 16 (32)                            | 20 (37)                           | 0.681   | 23 (48.9)                           | 54 (49.5)                          | 0.999   |
| <b>Age</b> , years ±SD                                 | 38.12±12.9                         | 37.62±13.05                       | 0.805   | 31.64±11.59                         | 31.88±13.48                        | 0.569   |
| <b>BMI</b> , kg/m2±SD                                  | 20.5±4.19                          | 19.42±4.39                        | 0.205   | 22.76±4.18                          | 23.74±4.6                          | 0.213   |
| <b>Active smokers</b> ,<br>n(%)                        | 2 (4)                              | 7 (13)                            | 0.116   | 14 (29.8)                           | 20 (19)                            | 0.289   |
| <b>Family history of<br/>Crohn’s disease</b> ,<br>n(%) | 1 (2)                              | 3 (5.6)                           | 0.619   | 9 (19.1)                            | 26 (23.9)                          | 0.541   |
| <b>Extra-intestinal<br/>manifestations</b> ,<br>n(%)   | 15 (27.8)                          | 7 (14)                            | 0.098   | 13 (30.2)                           | 40 (44)                            | 0.136   |

<sup>&</sup>stricturing, and/or penetrating, and/or perianal Crohn's disease phenotype.
